# Supplementary material for: Iridium oxide nanoparticle induced dual catalytic/inhibition based detection of phenol and pesticide compounds
Source: Royal Society of Chemistry journal article supplement (doi:10.1039/c3tb21765e), 2014-01-01
Supplement: c3tb21765e1.pdf [file c3tb21765e1.pdf]

## Supporting information

# Iridium oxide nanoparticles induced dual catalytic/inhibition based detection of phenol and pesticide compounds

*Carmen C. Mayorga-Martinez<sup>a,‡</sup>, Flavio Pino<sup>a,‡</sup>, Sevinc Kurbanoglu<sup>a, b,‡</sup>, Lourdes Rivas<sup>a</sup>, Sibel A. Ozkan<sup>b</sup>, Arben Merkoçi<sup>a, c\*</sup>*

<sup>a</sup>Nanobioelectronics & Biosensors Group, ICN2- Institut Catala de Nanociencia i Nanotecnologia, Campus UAB, 08193, Bellaterra, Barcelona, Spain

<sup>b</sup>Ankara University, Faculty of Pharmacy, Department of Analytical Chemistry, 06100, Tandogan, Ankara, Turkey

<sup>c</sup>ICREA, Barcelona, Catalonia, Spain.

\* E-mail: arben.merkoci@icn.cat

‡C. C. M.-M. , F. P. and S. K. contributed equally to this work.

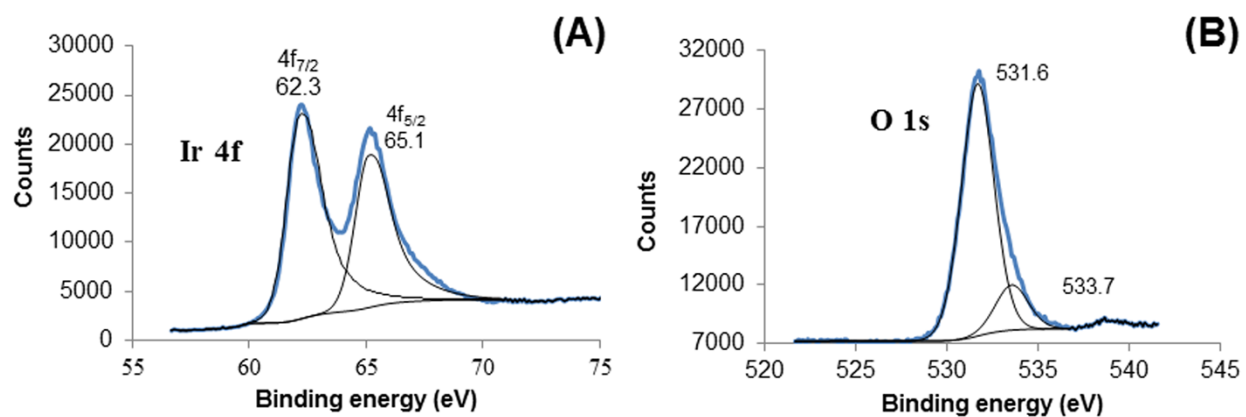

**Figure S1.** Iridium 4f spectrum of IrOx NPs

Table 1: Comparison between different chlorpyrifos biosensors reported in the literature.

| Electrode                          | Enzyme | Linear Range<br>( $\mu\text{M}$ )            | LOD<br>( $\mu\text{M}$ ) | Sample                    | Working Potential<br>(mV) | Ref       |
|------------------------------------|--------|----------------------------------------------|--------------------------|---------------------------|---------------------------|-----------|
| Gold disk electrodes<br>(d.1.6 mm) | AChE   | $1.0 \text{ e}^{-5}$ - $1.0 \text{ e}^{-0}$  | $1.0 \text{ e}^{-6}$     | Spiked river water        | 350<br>(DPV)              | [1]       |
| Mini carbon paste electrode        | AChE   | $1.0 \text{ e}^{-5}$ - $1.0 \text{ e}^{-0}$  | $4.0 \text{ e}^{-6}$     | -                         | 50                        | [2]       |
| gold electrode<br>(d=1 mm)         | AChE   | $5.0 \text{ e}^{-5}$ - $7.5 \text{ e}^{-2}$  | $5.0 \text{ e}^{-5}$     | Vegetable sample          | 600                       | [3]       |
| glassy carbon electrode            | TYR    | $7.1 \text{ e}^{-4}$ - $2.85 \text{ e}^{-2}$ | $5.7 \text{ e}^{-4}$     |                           | 6                         | [4]       |
| SPE                                | TYR    | $1 \text{ e}^{-2}$ - $1 \text{ e}^{-1}$      | $3.0 \text{ e}^{-3}$     | Spike tap and river water | -0.2                      | This work |

## REFERENCES

- [1] S. Viswanathan, H. Radecka, J. Radecki, *Biosens. Bioelectron.* 2009, **24**, 2772-2777
- [2] L. Zamfir, L. Rotariu, C. Bala, *Biosens. Bioelectron.* 2011, **26**, 3692-3695.
- [3] C. Zhai, X. Sun, W. Sao, Z. Gong, X. Wang, *Biosens. Bioelectron.* 2013, **42**, 124-130.
- [4] T. Liu, M. Xu, H. Yin, S. Ai, X. Qu, and S. Zong, *Microchim. Acta.* 2011, **175**, 129-135
